# Supplementary material for: Photoreceptor outer segment reflectivity with ultrahigh resolution visible light optical coherence tomography in systemic hydroxychloroquine use
Source: PubMed Central journal article supplement — medRxiv. 2024 Sep 12:2024.09.10.24313265. Preprint. [Version 1] doi: 10.1101/2024.09.10.24313265 (PMC11419217; doi:10.1101/2024.09.10.24313265), 2024-09-12
Supplement: NIHPP2024.09.10.24313265v1-supplement-1.pdf [file NIHPP2024.09.10.24313265v1-supplement-1.pdf]

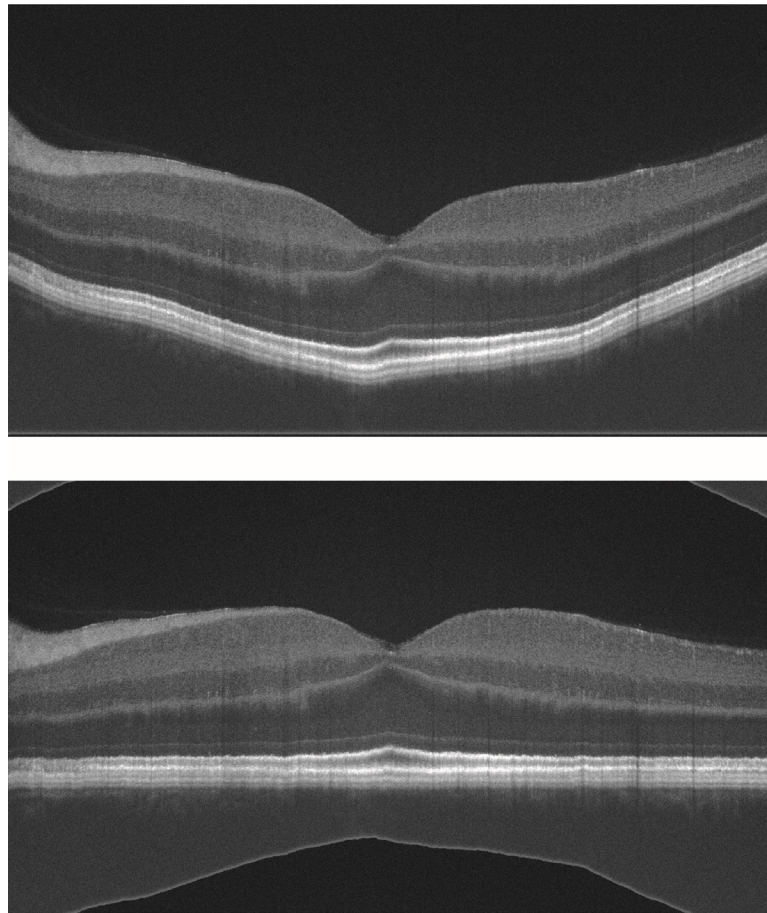

Supplemental Figure 1: **(a)** Sample raw output of foveal line scan from VIS-OCT device prior to image processing. **(b)** Foveal line scan following image flattening and contrast adjustment as described in Methods.

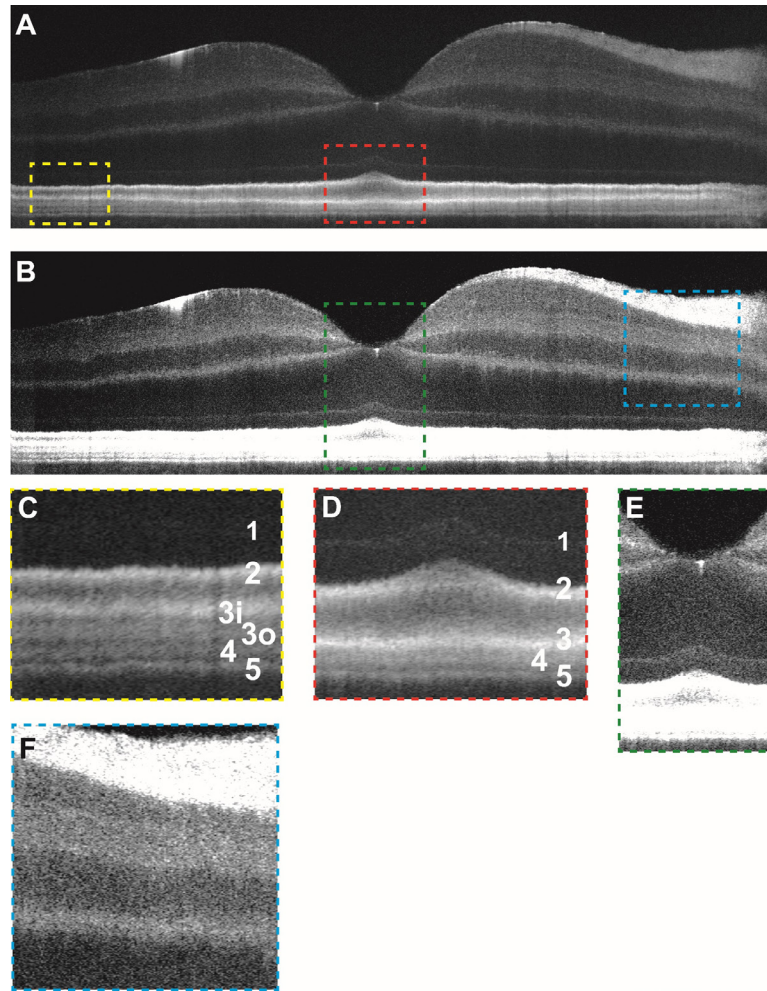

Supplemental Figure 2: (a) Contrast-adjusted VIS-OCT image of a 26-30 age range Caucasian male subject with no known ocular history or retinal pathology highlighting outer retinal features. (b) Contrast-adjusted image highlighting inner retinal features. (c) Magnified view of foveal outer retinal features seen in panel (a) demonstrating outer retinal banding pattern with outer retinal bands labeled. (d) Magnified view of parafoveal outer retina. (e) Magnified view of foveal inner retinal features seen in panel (c) (see abbreviations below). (f) Magnified view of parafoveal inner retinal features.

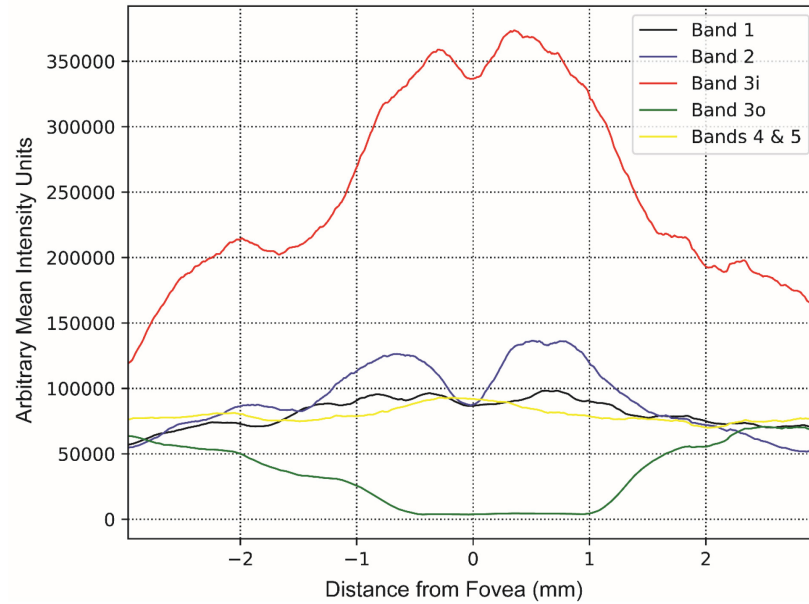

Supplemental Figure 3: Mean intensity of each outer retinal band (summation of intensity between manually segmented outer retinal bands) averaged across three control subjects shown relative to distance from the foveal pit for VIS-OCT scan displayed in Figure 2A. Manual segmentation of outer retinal bands performed independently by second grader.
